# Supplementary material for: Synergistic Anti-Tumor Effect of Palmitoylcarnitine and Dasatinib in Liver Cancer
Source: MDPI journal article supplement (doi:10.3390/livers2040026), 2022-11-01
Supplement: s1 [file s1]

## Supplementary Information

# Synergistic Anti-tumor Effect of Palmitoylcarnitine and Dasatinib in Liver Cancer

Ragini Singh <sup>1</sup>, Shuang Cheng <sup>1</sup>, Qinghua Zeng <sup>1</sup>, Santosh Kumar <sup>2,\*</sup> and Carlos Marques <sup>3,\*</sup>

<sup>1</sup> College of Agronomy, Liaocheng University, Liaocheng 252059, China

<sup>2</sup> Shandong Key Laboratory of Optical Communication Science and Technology, School of Physics Science and Information Technology, Liaocheng University, Liaocheng 252059, China

<sup>3</sup> i3N, Department of Physics, University of Aveiro, 3810-193 Aveiro, Portugal

\* Correspondence: santosh@lcu.edu.cn (S.K.); carlos.marques@ua.pt (C.M.)

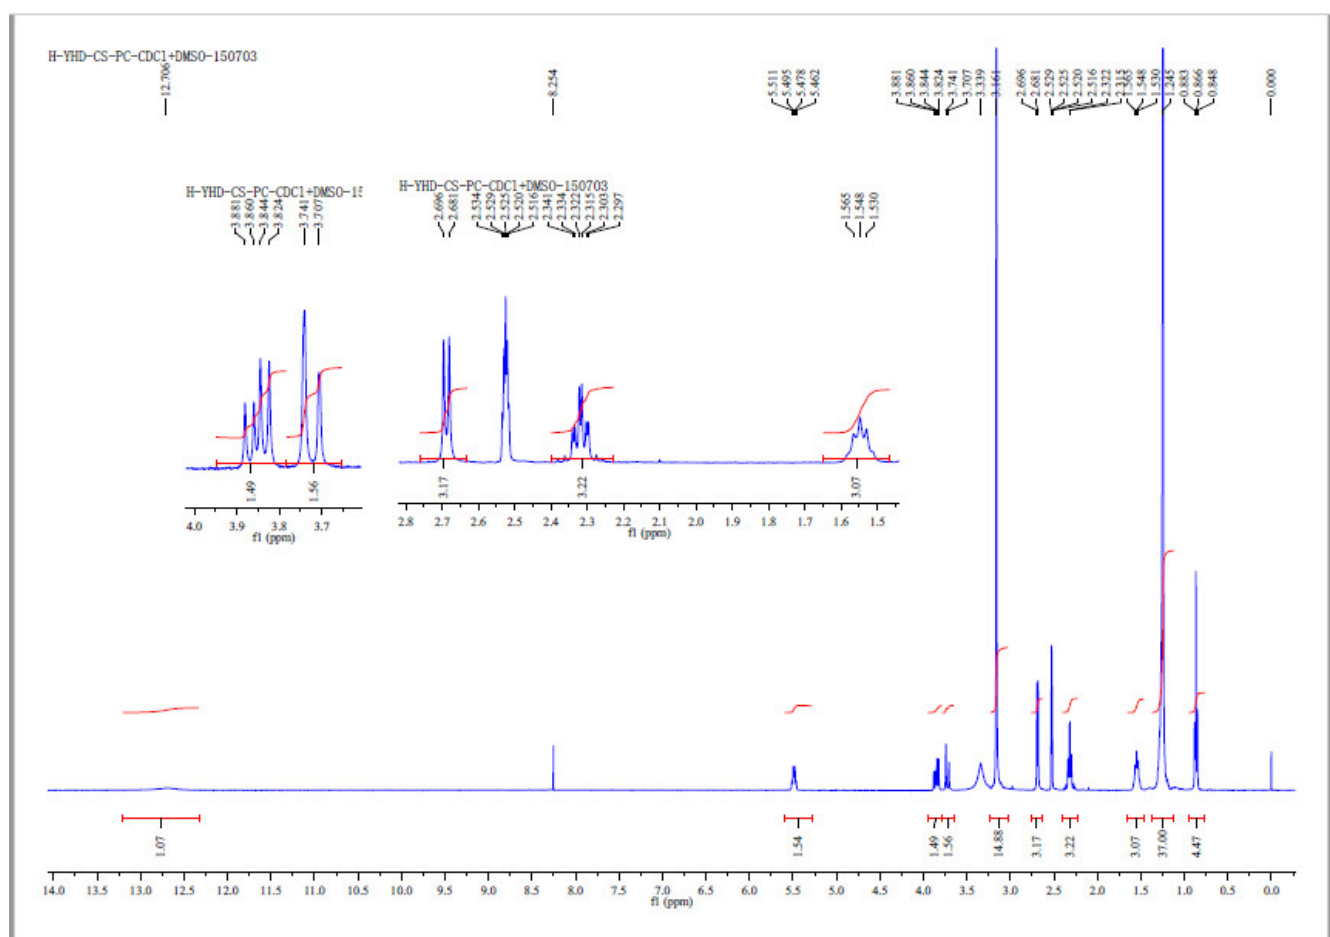

Figure S1. NMR spectra of synthesized Pcar.

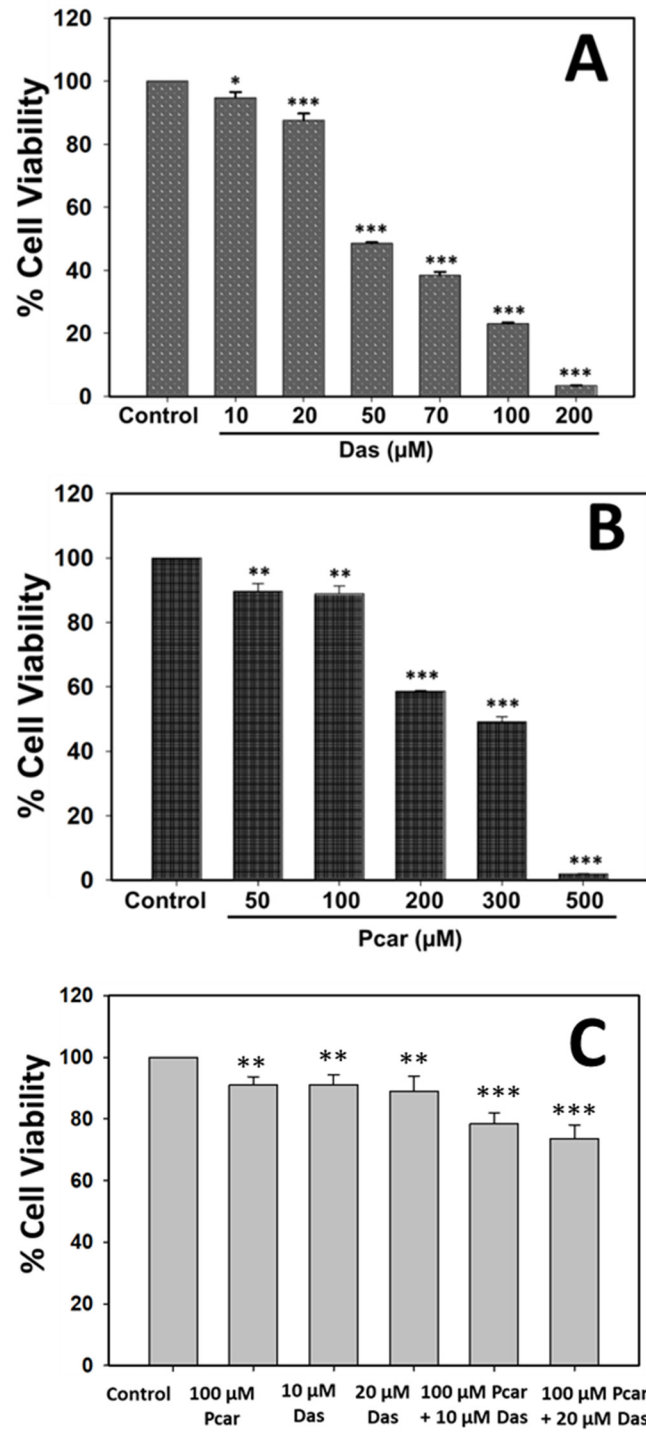

**Figure S2.** MTT assay showing the concentration dependent toxicity of (A) Das, (B) Pcar, and (C) Pcar And Das alone and in combination in HEK293 cells.

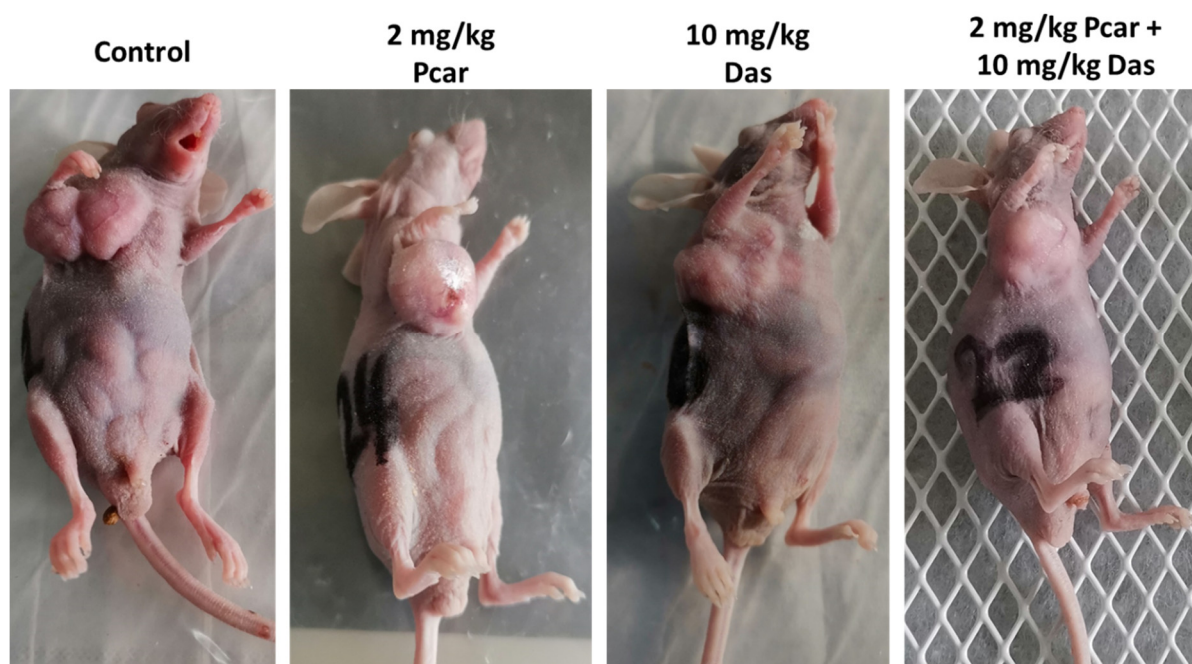

**Figure S3.** Representative image showing tumor growth in control mouse as well as Pcar and Das treated mouse both in combination and alone.

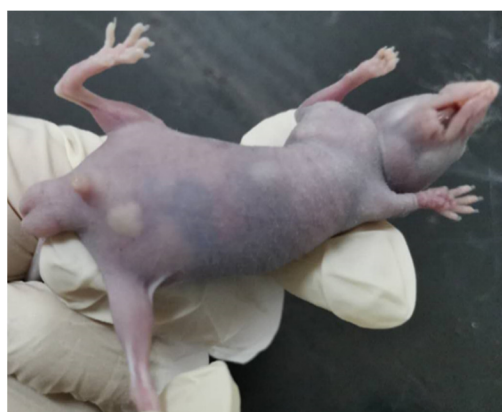

**Figure S4.** Representative image showing tumor migration on Das treated group.

**Table S1.** Tumor measurement (length and width).

| Mouse                        | Day1        |            | Day 2       |            | Day 3       |            | Day 4       |            | Day 5       |            |
|------------------------------|-------------|------------|-------------|------------|-------------|------------|-------------|------------|-------------|------------|
|                              | Length (mm) | Width (mm) |
| Control                      | 6.94        | 5.76       | 9.58        | 5.61       | 9.17        | 5.3        | 11.01       | 8.41       | 12.12       | 7..78      |
|                              | 6.75        | 3.16       | 9.16        | 4.32       | 10.32       | 4.73       | 9.89        | 5.99       | 11.17       | 6.88       |
|                              | 7.39        | 6.57       | 8.55        | 8.76       | 10.11       | 9.1        | 10.65       | 10.18      | 10.94       | 9.31       |
| 2mg/kg PCar                  | 4.99        | 4.73       | 7.6         | 7.35       | 9.67        | 8.4        | 10.43       | 10.35      | 11.3        | 10.7       |
|                              | 5.69        | 5.68       | 7.57        | 7.09       | 9.86        | 9.18       | 10.95       | 10.65      | 12.08       | 10.85      |
|                              | 6.17        | 4.45       | 7.42        | 6.7        | 9.73        | 7.46       | 10.36       | 10.13      | 11          | 10.78      |
| 10 mg/kg Das                 | 6.82        | 3.68       | 8.68        | 5.43       | 7.95        | 5.84       | 11.62       | 8.18       | 12.91       | 8.77       |
|                              | 6.21        | 5.18       | 7.88        | 6.83       | 7.51        | 6.66       | 8.56        | 6.99       | 9.24        | 8.14       |
|                              | 6.39        | 4.54       | 8.06        | 4.38       | 9.08        | 4.63       | 10.32       | 5.17       | 10.8        | 6.16       |
| 2mg/kg PCar+<br>10 mg/kg Das | 7.49        | 4.01       | 8.87        | 5.56       | 7.81        | 4.91       | 10.63       | 6.03       | 11.27       | 6.08       |
|                              | 5.03        | 4.17       | 5.12        | 5.12       | 6.63        | 6.13       | 7.81        | 6.39       | 7.77        | 7.21       |
|                              | 6.44        | 3.92       | 5..27       | 5.19       | 5.89        | 5.46       | 8.53        | 5.73       | 7.66        | 6.59       |
| Mouse                        | Day6        |            | Day 7       |            | Day 8       |            | Day 9       |            | Day 10      |            |
|                              | Length (mm) | Width (mm) |
| Control                      | 12.78       | 7.83       | 13.31       | 8.67       | 13.5        | 8.55       | 14.45       | 8.93       | 12.22       | 9.2        |
|                              | 12.54       | 8.12       | 13          | 8.73       | 14.06       | 8.25       | 13.9        | 9.56       | 13.86       | 8.83       |

|              |       |       |       |       |       |       |       |       |       |       |
|--------------|-------|-------|-------|-------|-------|-------|-------|-------|-------|-------|
|              | 11.72 | 9.19  | 11.67 | 9.25  | 11.96 | 10.5  | 13.18 | 11.29 | 12.79 | 9.84  |
|              | 11.32 | 9.93  | 12.4  | 9.93  | 13.13 | 9.45  | 14.98 | 10.9  | 13.19 | 11.5  |
| 2mg/kg PCar  | 12.04 | 11.06 | 12.37 | 11.69 | 2.42  | 11.86 | 12.26 | 12.07 | 12.62 | 11.73 |
|              | 11.76 | 11.14 | 12.73 | 11.56 | 12.5  | 10.87 | 12.33 | 10.72 | 12.82 | 12.37 |
|              | 11.68 | 6.89  | 14.54 | 10.86 | 13.4  | 10.53 | 14.18 | 12.81 | 13.89 | 10.75 |
| 10 mg/kg Das | 8.69  | 8.52  | 9.72  | 9.13  | 10.47 | 9.51  | 10.83 | 9.88  | 9.54  | 9.33  |
|              | 10.95 | 6.5   | 11.54 | 5.56  | 11.74 | 6.86  | 12.72 | 7.08  | 12.49 | 6.99  |
|              | 10.28 | 5.62  | 11.68 | 6.63  | 12.68 | 6.89  | 13.15 | 7.7   | 13.05 | 7.2   |
| 2mg/kg PCar+ | 7.23  | 8.27  | 9.03  | 7.82  | 9.37  | 7.97  | 8.42  | 7.34  | 9.04  | 8.04  |
| 10 mg/kg Das | 9.7   | 6.54  | 10.27 | 6.81  | 8.23  | 9.76  | 12.28 | 8.95  | 9.73  | 8.1   |

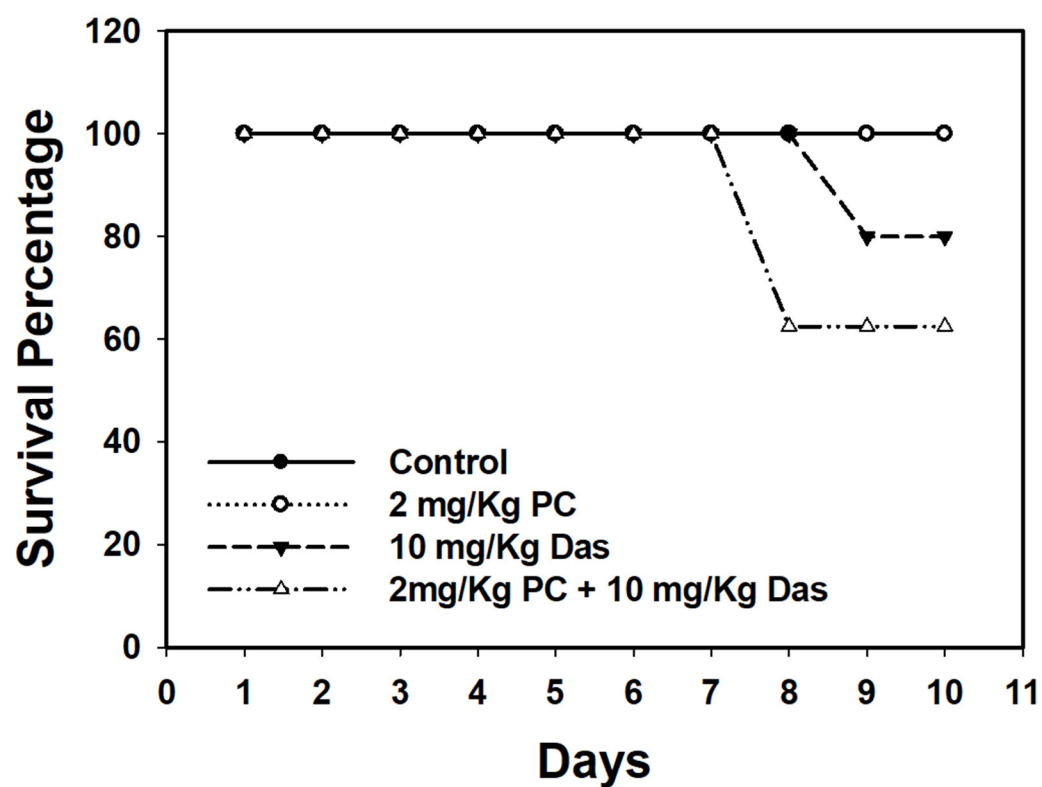

Figure S5. Mouse survival graph over time showing.
